# Supplementary material
Source: PubMed Central journal article supplement (PMC5012908)
Supplement: NIHMS806246-supplement.pdf [file NIHMS806246-supplement.pdf]

# Antifungal Activity of a $\beta$ -Peptide in Synthetic Urine Media: Toward Materials-Based Approaches to Reducing Catheter-Associated Urinary Tract Fungal Infections

Namrata Raman,<sup>1</sup> Myung-Ryul Lee,<sup>1</sup> Angélica de L. Rodríguez López,<sup>2</sup> Sean P. Palecek,<sup>1,\*</sup> and David M. Lynn<sup>1,3,\*</sup>

<sup>1</sup>Department of Chemical and Biological Engineering, 1415 Engineering Drive, <sup>2</sup>Materials Science Program, 1509 University Avenue, and <sup>3</sup>Department of Chemistry, 1101 University Avenue, University of Wisconsin – Madison, Madison, Wisconsin 53706, USA; Email: sppalecek@wisc.edu, dlynn@engr.wisc.edu

## Supporting Information

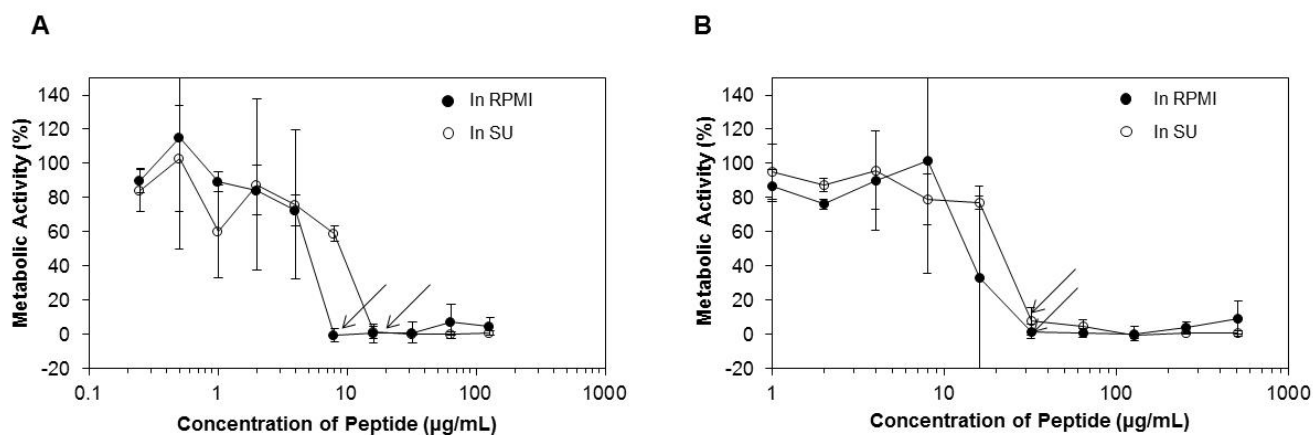

**Figure S1.** Plots of metabolic activity of *C. albicans* from (A) planktonic and (B) biofilm susceptibility testing of  $\beta$ -peptide **1** in SU (open circles) and RPMI media (solid circles). *C. albicans* cells ( $10^3$  cells/mL for planktonic assays, and  $10^6$  cells/mL for biofilm testing) were incubated in the presence of 2-fold dilutions of peptide for 48 hours and XTT was used to assess metabolic activity. Data points are the average of three replicates from at least two independent experiments and error bars denote standard deviation. Arrow indicates MIC of the peptide in respective media.

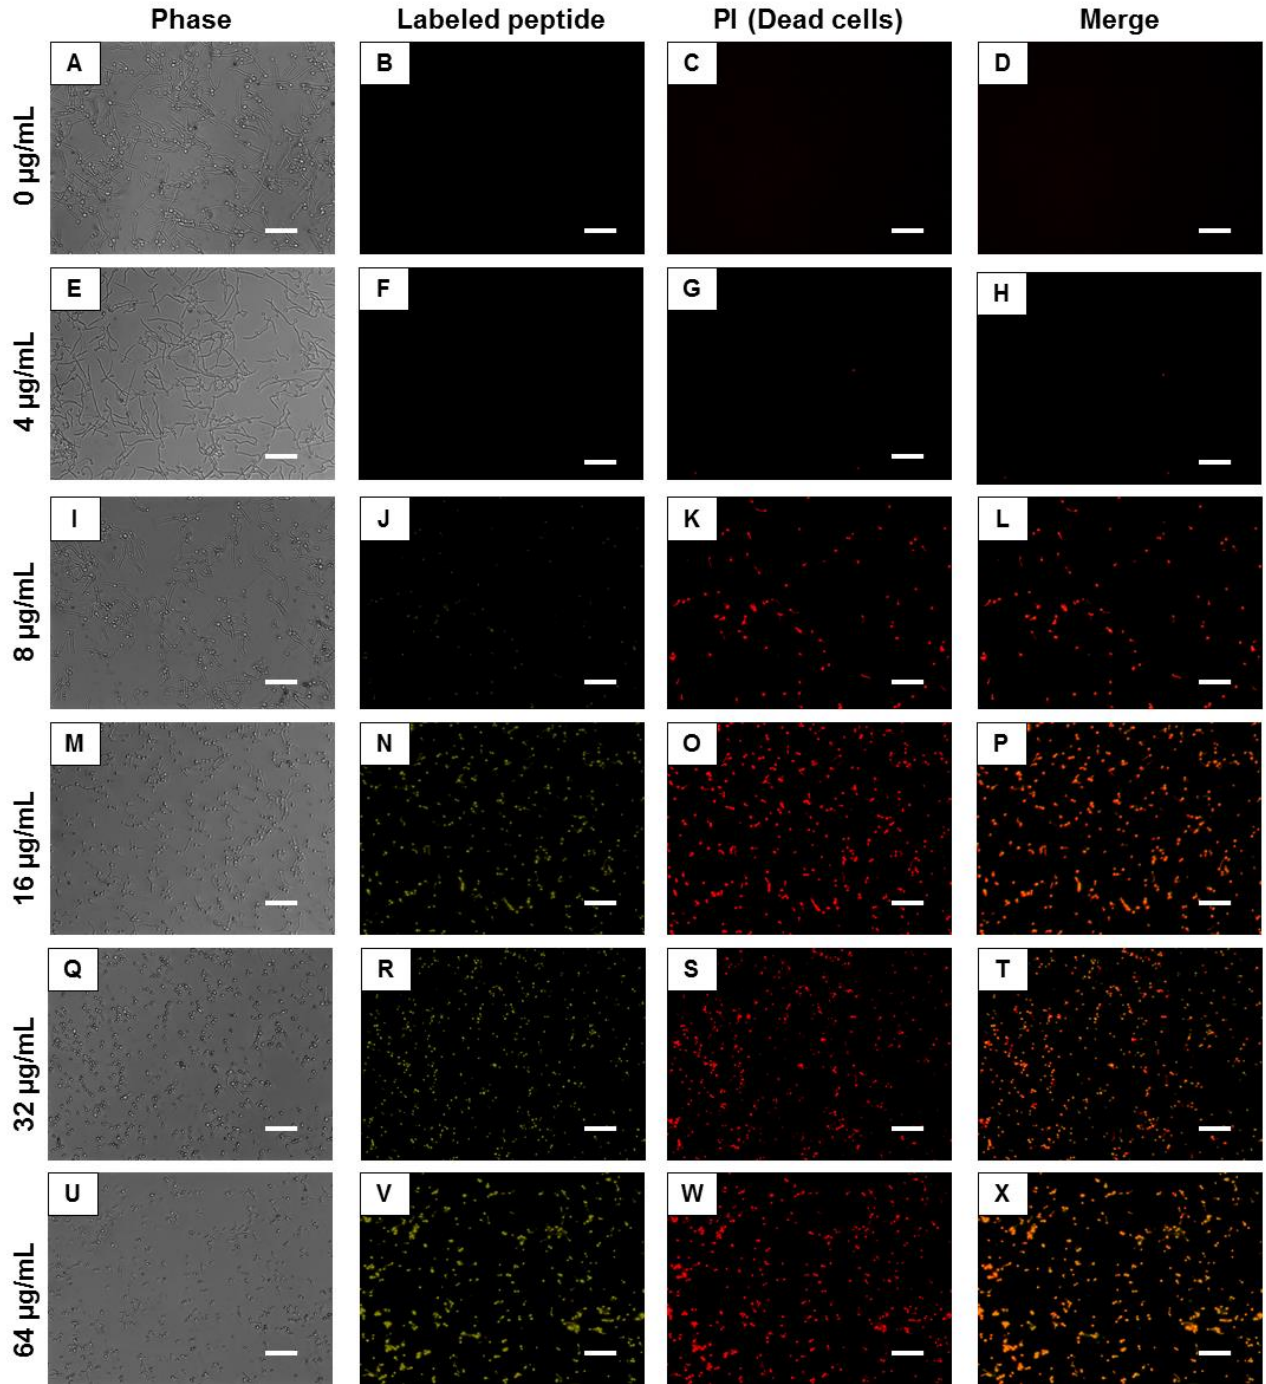

**Figure S2.** Phase contrast and fluorescence micrographs of *C. albicans* treated with  $\beta$ -peptide 1. Micrographs shown here expands on the merged images shown in Figure 2 and are from the same experiment. Cells ( $10^5$  cells/mL) were treated with the  $\beta$ -peptide (yellow) at 2-fold varying concentrations from 0 to 64  $\mu\text{g/mL}$  for 3.5 hours. Cells were stained with PI to identify dead cells (red). Phase contrast (A,E,I,M,Q,U), unmerged yellow (B,F,J,N,R,V) and red (C,G,K,O,S,W) channels and merged (D,H,L,P,T,X) micrographs are shown. Scale bars = 50  $\mu\text{m}$ .

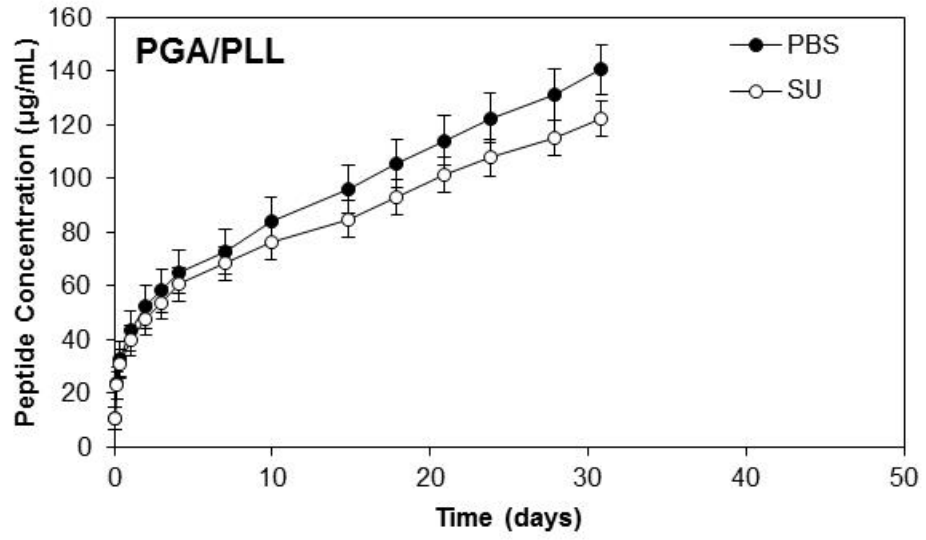

**Figure S3.** Plot of the release of  $\beta$ -peptide 1 from polyethylene catheter tubes coated with  $\beta$ -peptide-loaded PGA/PLL films into PBS (solid circles) and modified SU medium (open circles). Data points are averages of three technical replicates and error bars denote standard deviations.
